# Supplementary material for: Aberrant islet unfolded protein response in type 2 diabetes
Source: PubMed Central journal article supplement — Sci Rep. 2014 Feb 11;4:4054. doi: 10.1038/srep04054 (PMC3920274; doi:10.1038/srep04054), 2014-02-11
Supplement: srep04054-s1.pdf [file srep04054-s1.pdf]

## **Aberrant islet unfolded protein response in type 2 diabetes**

Feyza Engin<sup>1</sup>, Truc Nguyen<sup>1</sup>, Alena Yermalovich<sup>1</sup>, Gökhan S. Hotamisligil<sup>1,2</sup>.

<sup>1</sup>Department of Genetics and Complex Diseases, and the <sup>2</sup>Broad Institute of Harvard and MIT, Harvard School of Public Health, Boston, MA 02115.

Supplemental Information

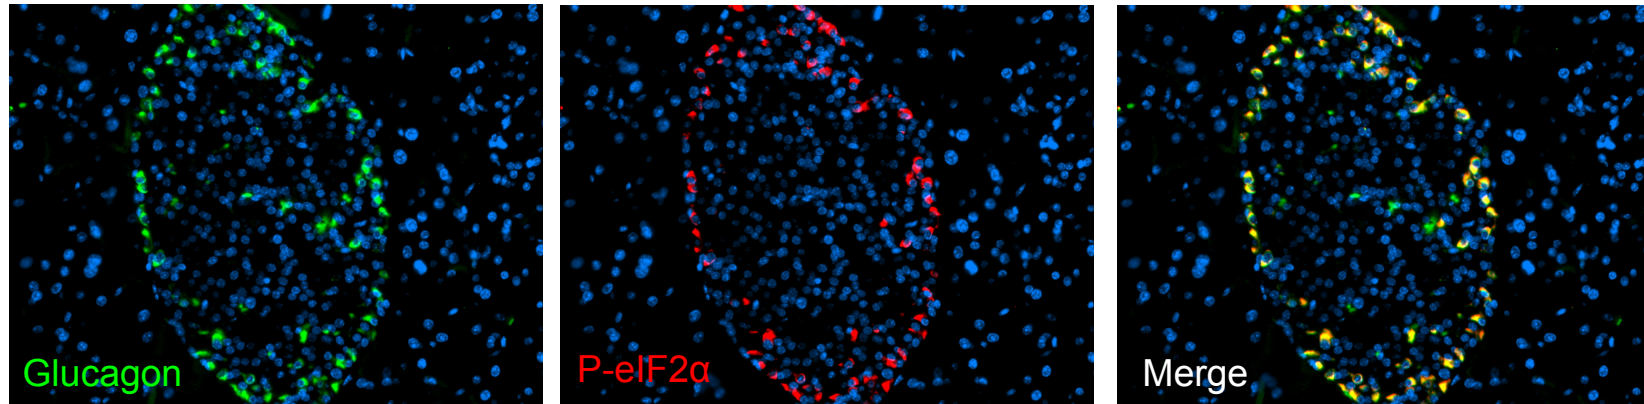

**Supplemental Figure 1. P-eIF2 $\alpha$  localizes to pancreatic  $\alpha$ -cells in mouse islets.** Pancreatic section from *ob/ob* mouse stained with glucagon (green), P-eIF2 $\alpha$  (red), and DAPI (blue).
